# Supplementary material for: Effects of Climate Change on the Distribution of Threatened Fishing Bat Myotis pilosus in China
Source: MDPI journal article supplement (doi:10.3390/ani13111784), 2023-05-27
Supplement: s1 [file s1]

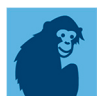**Table S1** *Myotis pilosus* occurrence coordinates in China

| Species               | Longitude/° | Latitude/° |
|-----------------------|-------------|------------|
| <i>Myotis pilosus</i> | 99.16       | 25.13      |
| <i>Myotis pilosus</i> | 100.55      | 25.49      |
| <i>Myotis pilosus</i> | 100.73      | 22.62      |
| <i>Myotis pilosus</i> | 102.34      | 24.50      |
| <i>Myotis pilosus</i> | 104.44      | 31.63      |
| <i>Myotis pilosus</i> | 105.69      | 25.44      |
| <i>Myotis pilosus</i> | 105.78      | 26.06      |
| <i>Myotis pilosus</i> | 107.15      | 28.23      |
| <i>Myotis pilosus</i> | 107.44      | 33.73      |
| <i>Myotis pilosus</i> | 107.57      | 29.17      |
| <i>Myotis pilosus</i> | 107.75      | 31.19      |
| <i>Myotis pilosus</i> | 109.89      | 18.85      |
| <i>Myotis pilosus</i> | 109.93      | 32.63      |
| <i>Myotis pilosus</i> | 110.27      | 20.01      |
| <i>Myotis pilosus</i> | 110.36      | 25.29      |
| <i>Myotis pilosus</i> | 110.95      | 19.65      |
| <i>Myotis pilosus</i> | 111.33      | 25.30      |
| <i>Myotis pilosus</i> | 111.42      | 33.30      |
| <i>Myotis pilosus</i> | 111.96      | 22.47      |
| <i>Myotis pilosus</i> | 114.12      | 23.65      |
| <i>Myotis pilosus</i> | 114.57      | 29.16      |
| <i>Myotis pilosus</i> | 115.73      | 27.23      |
| <i>Myotis pilosus</i> | 115.73      | 39.71      |
| <i>Myotis pilosus</i> | 116.55      | 31.47      |
| <i>Myotis pilosus</i> | 116.94      | 36.44      |
| <i>Myotis pilosus</i> | 117.40      | 40.05      |
| <i>Myotis pilosus</i> | 117.67      | 36.6       |
| <i>Myotis pilosus</i> | 117.69      | 28.21      |
| <i>Myotis pilosus</i> | 117.70      | 29.39      |
| <i>Myotis pilosus</i> | 117.94      | 27.63      |
| <i>Myotis pilosus</i> | 118.28      | 28.46      |
| <i>Myotis pilosus</i> | 120.03      | 30.12      |
| <i>Myotis pilosus</i> | 120.62      | 31.31      |

**Table S2** Analysis of variable contributions for the current suitable habitats of *M. pilosus*.

| Variable | Percent contribution | Permutation importance |
|----------|----------------------|------------------------|
| Bio6     | 19.3                 | 51.3                   |
| TREE     | 10.6                 | 4.5                    |
| Slope    | 9.5                  | 7                      |
| Bio12    | 8.9                  | 0                      |
| Landuse  | 8.2                  | 1.9                    |
| Bio14    | 8                    | 0.2                    |
| Bio16    | 7.4                  | 1.4                    |
| Light    | 7                    | 3.6                    |
| Bio17    | 6.8                  | 0                      |
| Bio18    | 2.7                  | 1.1                    |
| Dis_riv  | 2                    | 5.8                    |
| Bio15    | 1.8                  | 5.4                    |
| Aspect   | 1.6                  | 0.1                    |
| Dis_set  | 1.1                  | 3.8                    |
| Bio1     | 0.9                  | 1.5                    |
| Altitude | 0.8                  | 5.5                    |
| NDVI     | 0.6                  | 3.3                    |
| Bio13    | 0.5                  | 1.2                    |
| Bio19    | 0.5                  | 0.3                    |
| Bio2     | 0.4                  | 0.2                    |
| Bio4     | 0.4                  | 0.1                    |
| Dis_roa  | 0.3                  | 0.6                    |
| Hii      | 0.2                  | 1.1                    |
| Bio9     | 0.2                  | 0                      |
| Bio7     | 0                    | 0                      |
| Bio8     | 0                    | 0                      |

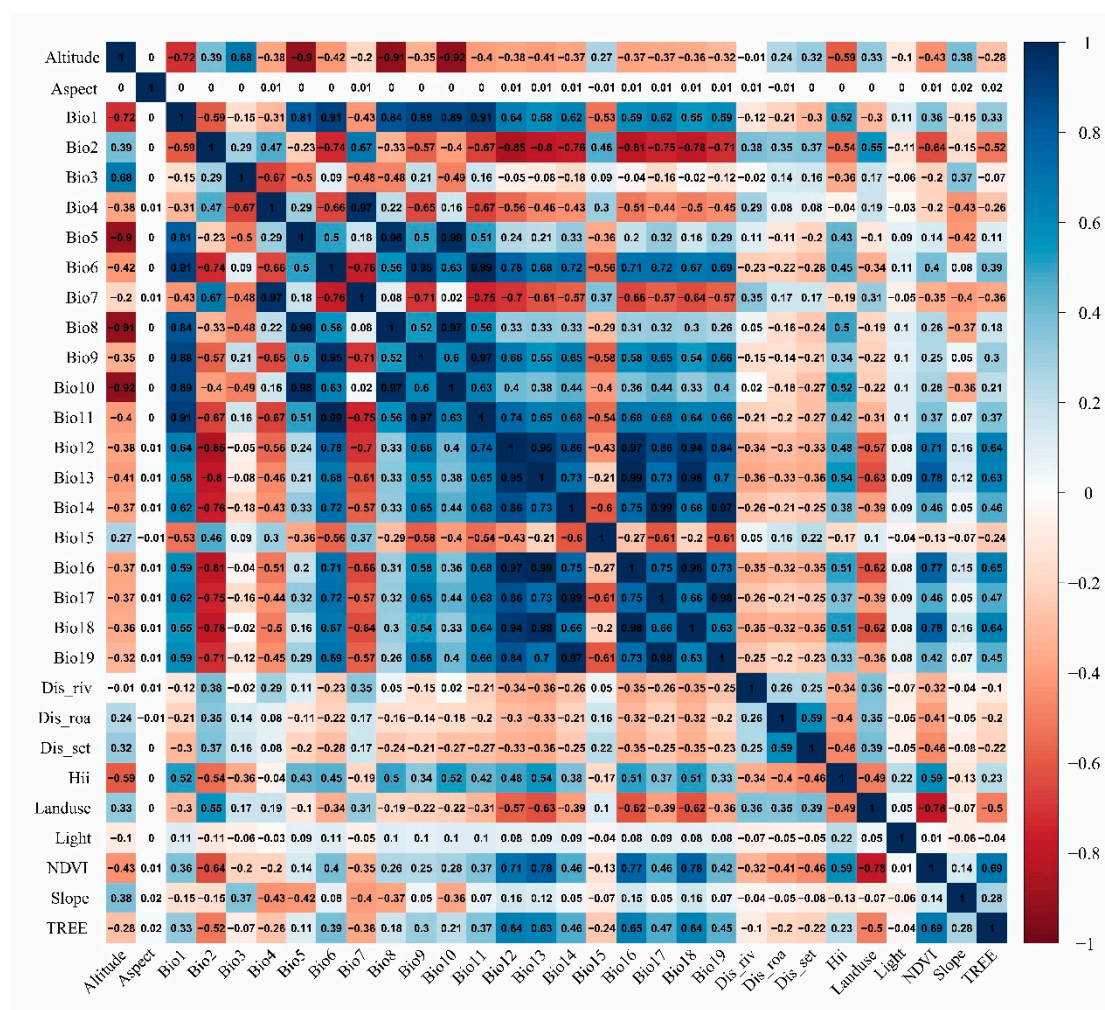

Figure S1 Correlation analysis based on 30 environmental variables.

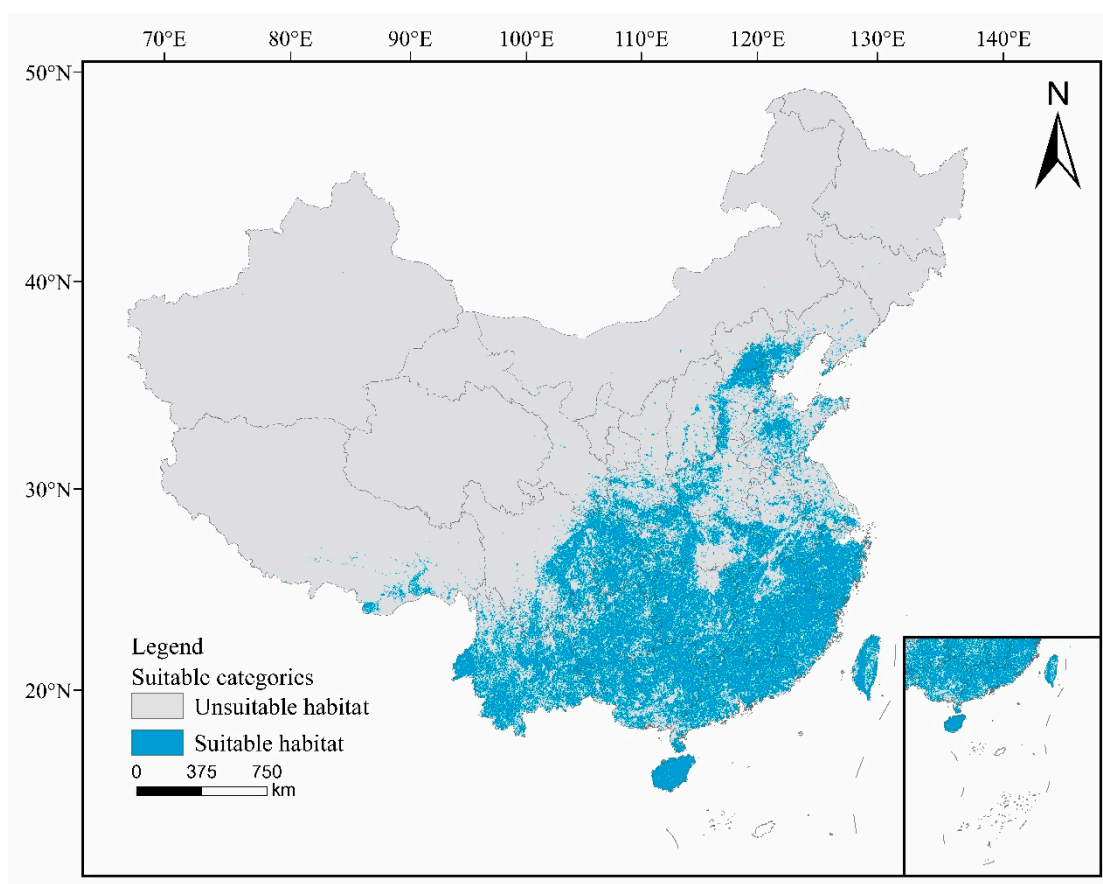

**Figure S2** Distribution pattern of *M. pilosus* under current climate scenario.

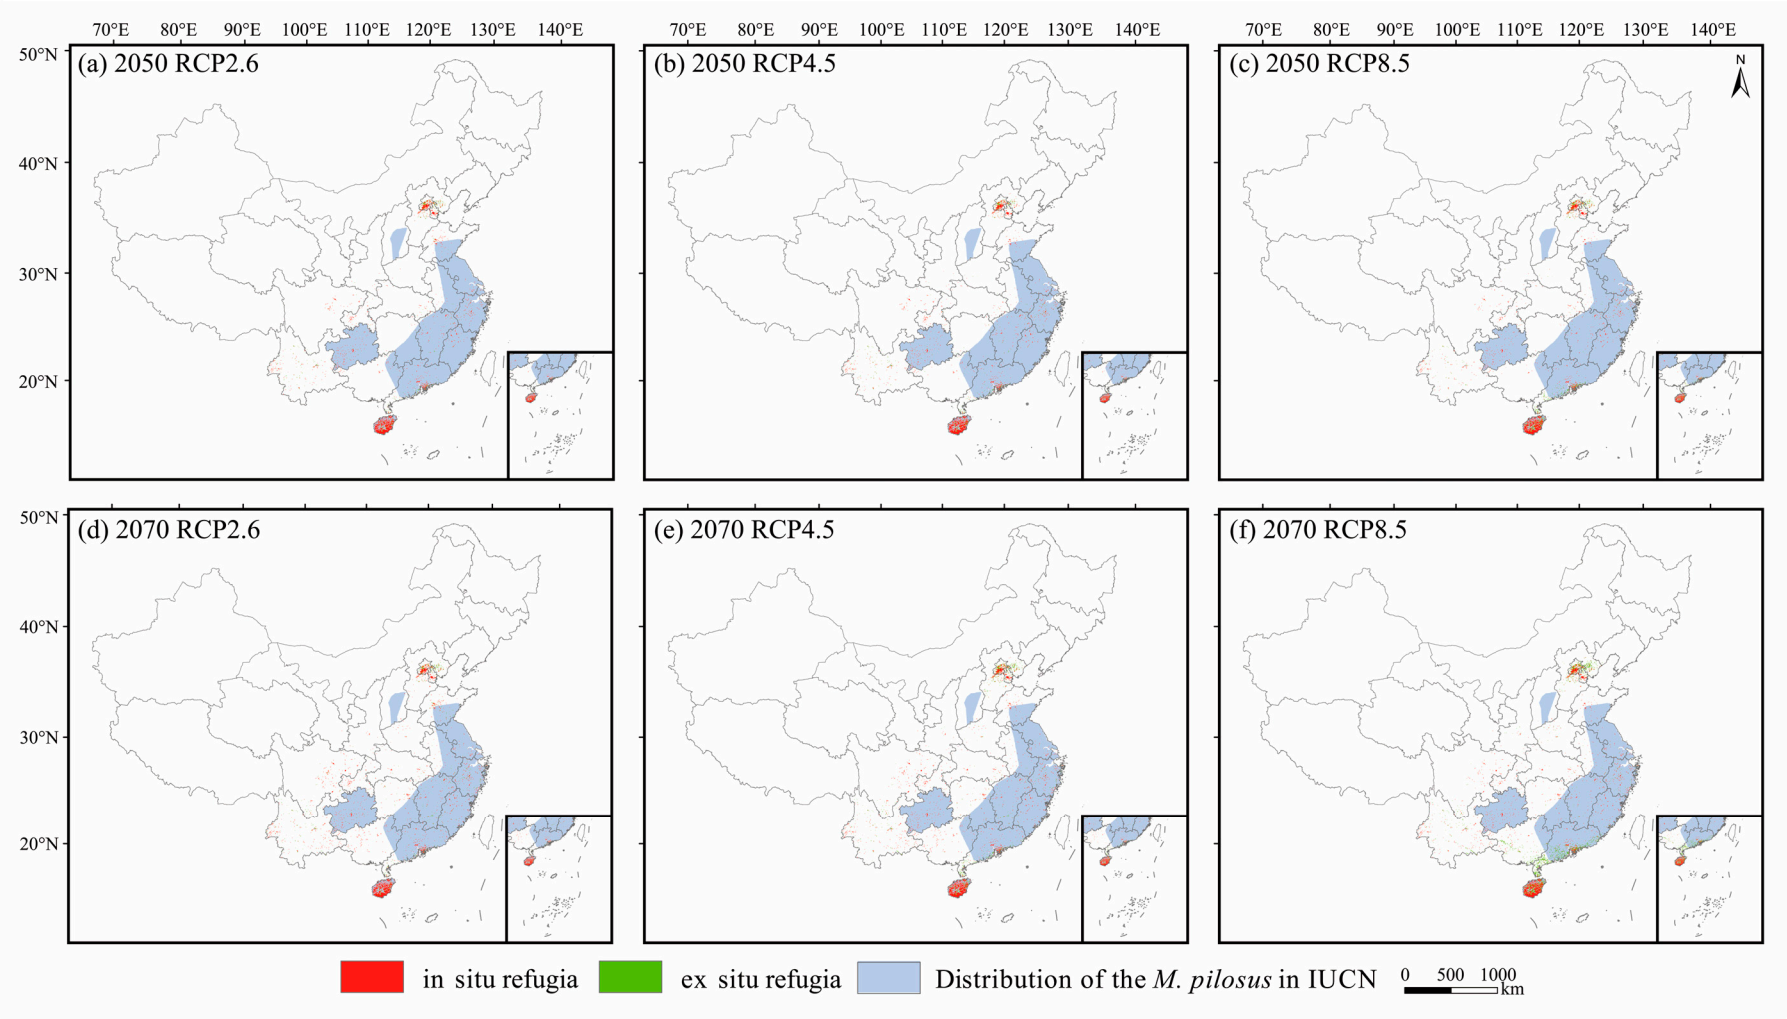

**Figure S3** Distribution of in situ and ex situ refugia for *M. pilosus* under different climate scenarios.
